# Supplementary material for: Highly polarized [GeOTe3] motif-driven structural order promotion and an enhanced second harmonic generation response in the new nonlinear optical oxytelluride Ba3Ge2O4Te3
Source: Royal Society of Chemistry journal article supplement (doi:10.1039/d1tc05177f), 2021-11-18

*Supporting Information for*

**Highly Polarized [GeOTe<sub>3</sub>] Motif-Driven Structure Order Exaltation  
and Enhanced Second Harmonic Generation Response in the New  
Nonlinear Optical Oxytelluride Ba<sub>3</sub>Ge<sub>2</sub>O<sub>4</sub>Te<sub>3</sub>**

Mengran Sun,<sup>†,‡,§</sup> Xingyu Zhang,<sup>†,‡,§</sup> Chunxiao Li,<sup>†,‡,§</sup> Wenhao Liu,<sup>†,‡,§</sup> Zheshuai Lin,<sup>†</sup>  
and Jiyong Yao<sup>†,‡,\*</sup>

<sup>†</sup> Beijing Center for Crystal Research and Development, Key Lab of Functional Crystals and Laser Technology,  
Technical Institute of Physics and Chemistry, Chinese Academy of Sciences, Beijing 100190, P. R. China.

<sup>‡</sup> Center of Materials Science and Optoelectronics Engineering, University of Chinese Academy of Sciences, Beijing  
100049, P. R. China.

<sup>§</sup> University of Chinese Academy of Sciences, Beijing 100049, P. R. China.

\*Corresponding author:

Jiyong Yao; jyao@mail.ipc.ac.cn.

**Table S1:** Atomic Coordinates, equivalent isotropic displacement parameters, and bond valence sums (BVS) for Ba<sub>3</sub>Ge<sub>2</sub>O<sub>4</sub>Te<sub>3</sub>.

| Atom | Wyckoff site | x          | y           | z           | $U_{eq}$  | BVS    |
|------|--------------|------------|-------------|-------------|-----------|--------|
| Ba1  | 9b           | 0.47554(6) | 0.5244.6(6) | 0.39915(10) | 0.0133(4) | 2.087  |
| Ge1  | 3a           | 0.6667     | 0.3333      | 0.6785(4)   | 0.0146(7) | 3.772  |
| Ge2  | 3a           | 0.6667     | 0.3333      | 0.2899(4)   | 0.0144(8) | 4.166  |
| O1   | 9b           | 0.5818(6)  | 0.4182(6)   | 0.2210(14)  | 0.014(2)  | -2.125 |
| O2   | 9b           | 0.64303(0) | 0.3570(30)  | 0.4800(50)  | 0.0402(0) | -1.821 |
| Te1  | 9b           | 0.53959(7) | 0.46041(7)  | 0.77531(14) | 0.0161(4) | -1.954 |

**Table S2:** Selected bond Lengths (Å) and Angles (°) for Ba<sub>3</sub>Ge<sub>2</sub>O<sub>4</sub>Te<sub>3</sub>.

| Lengths (Å)                            |            |                                      |            |
|----------------------------------------|------------|--------------------------------------|------------|
| Ba1–O1 <sup>3</sup>                    | 2.732(7)   | Ge1–O2 <sup>9</sup>                  | 1.83(4)    |
| Ba1–O1 <sup>1</sup>                    | 2.732(7)   | Ge1–O2                               | 1.83(4)    |
| Ba1–O1                                 | 2.573(12)  | Ge1–Te1 <sup>9</sup>                 | 2.5625(18) |
| Ba1–O2                                 | 3.26(5)    | Ge1–Te1                              | 2.5625(18) |
| Ba1–Te1 <sup>4</sup>                   | 3.6580(12) | Ge1–Te1 <sup>8</sup>                 | 2.5625(18) |
| Ba1–Te1 <sup>5</sup>                   | 3.7967(8)  | Ge2–O1 <sup>8</sup>                  | 1.723(12)  |
| Ba1–Te1 <sup>6</sup>                   | 3.6580(12) | Ge2–O1 <sup>9</sup>                  | 1.723(12)  |
| Ba1–Te1                                | 3.5877(15) | Ge2–O1                               | 1.723(12)  |
| Ba1–Te1 <sup>7</sup>                   | 3.7967(8)  | Ge2–O2                               | 1.76(4)    |
| Ge1–O2 <sup>8</sup>                    | 1.83(4)    | Ge2–O2 <sup>8</sup>                  | 1.76(4)    |
| Angles (°)                             |            |                                      |            |
| O2 <sup>8</sup> –Ge1–O2 <sup>9</sup>   | 24(3)      | O1 <sup>8</sup> –Ge2–O2 <sup>9</sup> | 117.7(8)   |
| O2 <sup>8</sup> –Ge1–O2                | 24(3)      | O1–Ge2–O2 <sup>8</sup>               | 117.7(8)   |
| O2 <sup>9</sup> –Ge1–O2                | 24(3)      | O1 <sup>9</sup> –Ge2–O2 <sup>9</sup> | 96.4(18)   |
| O2 <sup>8</sup> –Ge1–Te1 <sup>8</sup>  | 95.8(17)   | O1–Ge2–O2 <sup>9</sup>               | 117.7(8)   |
| O2–Ge1–Te1                             | 95.8(17)   | O1 <sup>9</sup> –Ge2–O2              | 117.7(8)   |
| O2–Ge1–Te1 <sup>8</sup>                | 116.3(7)   | O1 <sup>8</sup> –Ge2–O2 <sup>8</sup> | 96.4(18)   |
| O2 <sup>9</sup> –Ge1–Te1 <sup>8</sup>  | 116.3(7)   | O1 <sup>8</sup> –Ge2–O1 <sup>9</sup> | 107.9(5)   |
| O2 <sup>8</sup> –Ge1–Te1 <sup>9</sup>  | 116.3(7)   | O1 <sup>8</sup> –Ge2–O1              | 107.9(5)   |
| O2 <sup>8</sup> –Ge1–Te1               | 116.3(7)   | O1 <sup>9</sup> –Ge2–O1              | 107.9(5)   |
| O2 <sup>9</sup> –Ge1–Te1 <sup>9</sup>  | 95.8(17)   | O1–Ge2–O2                            | 96.4(18)   |
| O2–Ge1–Te1 <sup>9</sup>                | 116.3(7)   | O1 <sup>8</sup> –Ge2–O2              | 117.7(8)   |
| O2 <sup>9</sup> –Ge1–Te1               | 116.3(7)   | O1 <sup>9</sup> –Ge2–O2 <sup>8</sup> | 117.7(8)   |
| Te1 <sup>9</sup> –Ge1–Te1 <sup>8</sup> | 109.11(8)  | O2 <sup>8</sup> –Ge2–O2              | 25(3)      |
| Te1 <sup>9</sup> –Ge1–Te1              | 109.11(8)  | O2 <sup>9</sup> –Ge2–O2 <sup>8</sup> | 25(3)      |
| Te1 <sup>8</sup> –Ge1–Te1              | 109.11(8)  | O2 <sup>9</sup> –Ge2–O2              | 25(3)      |

Symmetry codes: <sup>1</sup>-1/3+X,1/3+Y,1/3+Z; <sup>2</sup>2/3+Y-X,4/3-X,1/3+Z; <sup>3</sup>2/3+Y-X,4/3-X,-2/3+Z; <sup>4</sup>1/3+Y-X,2/3-X,-1/3+Z; <sup>5</sup>2/3-Y,1/3+X-Y,-2/3+Z; <sup>6</sup>4/3-Y,2/3+X-Y,-1/3+Z; <sup>7</sup>2/3-Y,1/3+X-Y,1/3+Z; <sup>8</sup>1-Y,+X-Y,+Z; <sup>9</sup>1+Y-X,1-X,+Z; <sup>10</sup>1/3+X,-1/3+Y,-1/3+Z; <sup>11</sup>4/3-Y,2/3+X-Y,2/3+Z; <sup>12</sup>1/3+Y-X,2/3-X,2/3+Z

**Figure S1.** The basic building unit of  $\text{GeO}_4$  and  $\text{GeOTe}_3$  polyhedron in  $\text{Ba}_2\text{ZnGe}_2\text{O}_7$  and  $\text{Ba}_3\text{Ge}_2\text{O}_4\text{Te}_3$ , respectively.

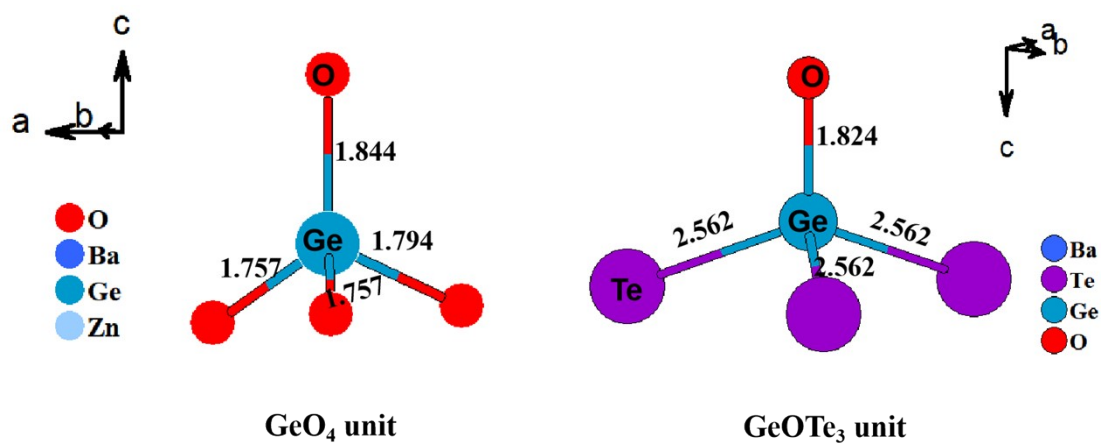

**Figure S2.** The basic building unit of  $\text{BaO}_8$  and  $\text{BaO}_3\text{Te}_5$  polyhedron in  $\text{Ba}_2\text{ZnGe}_2\text{O}_7$  and  $\text{Ba}_3\text{Ge}_2\text{O}_4\text{Te}_3$ , respectively.

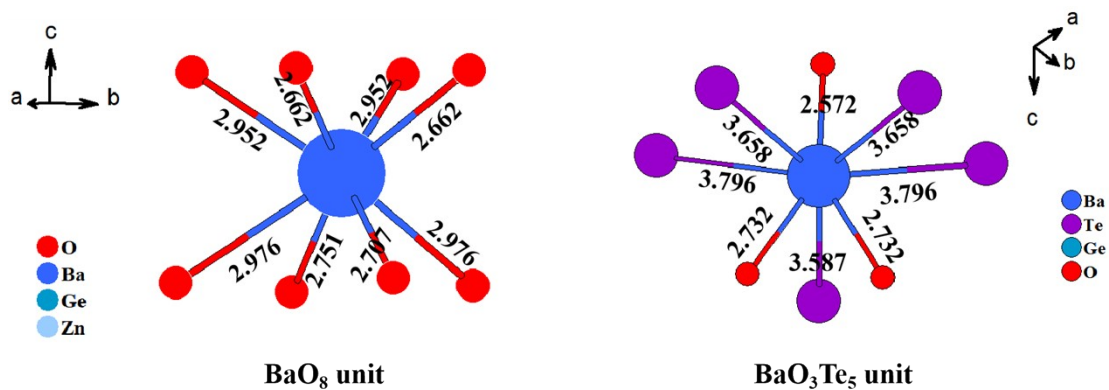

Supplement: d1tc05177f1.pdf [file d1tc05177f1.pdf]
